# Supplementary material for: The secretory deficit in islets from db/db mice is mainly due to a loss of responding beta cells
Source: PubMed Central journal article supplement (PMC4052007; doi:10.1007/s00125-014-3226-8), 2014-04-06
Supplement: 125_2014_3226_MOESM2_ESM.pdf [file 125_2014_3226_MOESM2_ESM.pdf]

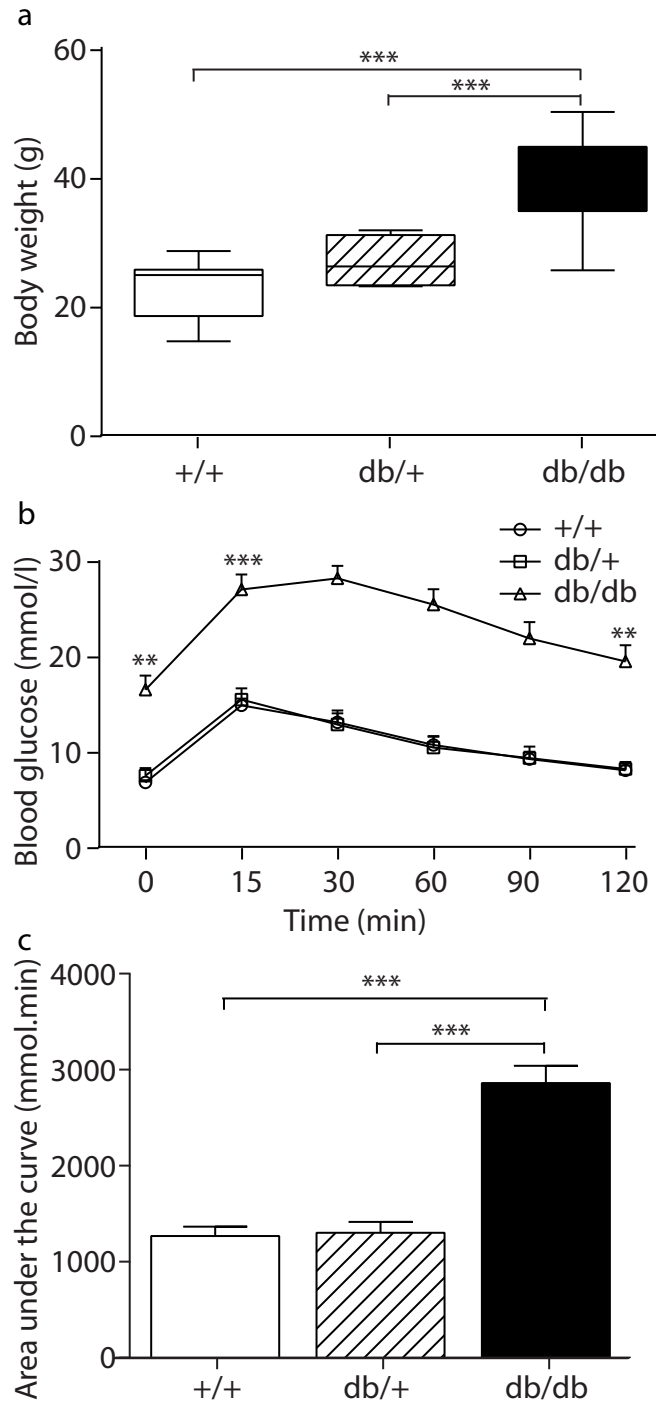

ESM Fig. 1 Db/db mice show a diabetic phenotype. (a) shows the increase in body weight in littermates of the wild-type, db/+ and db/db animals measured at 12 weeks. (b and c) significant changes were observed in the GTTs and integrated AUCs from the different mice (aged between 13 and 18 weeks, n=4-27 mice). Asterisks indicate p values from Student's t test analysis, \*\*p<0.01, \*\*\*p<0.001.
